# Supplementary material for: Glucose Favors Lipid Anabolic Metabolism in the Invasive Breast Cancer Cell Line MDA-MB-231
Source: PubMed Central journal article supplement (PMC7168317; doi:10.3390/biology9010016), 2020-01-10
Supplement: biology-09-00016-s001.pdf [file biology-09-00016-s001.pdf]

## Supplementary Figures

### Glucose favors lipid anabolic metabolism in the invasive breast cancer cell line MDA-MB-231

M<sup>a</sup> Carmen Ocaña <sup>1,2</sup>, Beatriz Martínez-Poveda <sup>1,2</sup>, Ana R. Quesada <sup>1,2,3</sup> and Miguel Ángel Medina <sup>1,2,3,\*</sup>

- <sup>1</sup> Universidad de Málaga, Andalucía Tech, Departamento de Biología Molecular y Bioquímica, Facultad de Ciencias, E-29071 Málaga, Spain
  - <sup>2</sup> IBIMA (Biomedical Research Institute of Málaga), E-29071 Málaga, Spain
  - <sup>3</sup> CIBER de Enfermedades Raras (CIBERER), E-29071 Málaga, Spain
- \* Correspondence: medina@uma.es; Tel.: +34 952137132

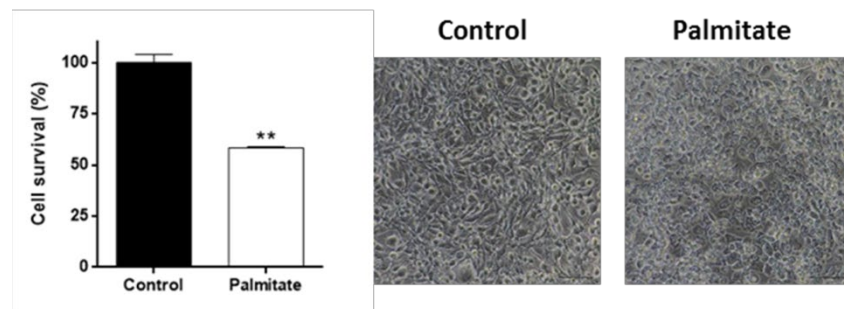

**Figure S1.** Effect of long time exposure with palmitate in MDA-MB-231 cells. Representative photographs and quantification of 0.5 mM palmitate effect on cell viability in media containing glucose and glutamine after an overnight incubation. Bar scale = 91.75  $\mu$ m. Data are expressed as means  $\pm$  SD of one experiment with duplicates. \*\* $p < 0.01$ .
